## RESEARCH ARTICLE

# Hox proteins drive cell segregation and non-autonomous apical remodelling during hindbrain segmentation

Fabrice Prin<sup>1</sup>, Patricia Serpente<sup>1</sup>, Nobue Itasaki<sup>2,\*</sup> and Alex P. Gould<sup>1,‡</sup>

## ABSTRACT

Hox genes encode a conserved family of homeodomain transcription factors regulating development along the major body axis. During embryogenesis, Hox proteins are expressed in segment-specific patterns and control numerous different segment-specific cell fates. It has been unclear, however, whether Hox proteins drive the epithelial cell segregation mechanism that is thought to initiate the segmentation process. Here, we investigate the role of vertebrate Hox proteins during the partitioning of the developing hindbrain into lineage-restricted units called rhombomeres. Loss-of-function mutants and ectopic expression assays reveal that Hoxb4 and its paralogue Hoxd4 are necessary and sufficient for cell segregation, and for the most caudal rhombomere boundary (r6/r7). Hox4 proteins regulate Eph/ephrins and other cell-surface proteins, and can function in a non-cell-autonomous manner to induce apical cell enlargement on both sides of their expression border. Similarly, other Hox proteins expressed at more rostral rhombomere interfaces can also regulate Eph/ephrins, induce apical remodelling and drive cell segregation in ectopic expression assays. However, Krox20, a key segmentation factor expressed in odd rhombomeres (r3 and r5), can largely override Hox proteins at the level of regulation of a cell surface target, EphA4. This study suggests that most, if not all, Hox proteins share a common potential to induce cell segregation but in some contexts this is masked or modulated by other transcription factors.

**KEY WORDS:** Hox, Segmentation, Cell segregation, Cell sorting, Cell affinities, Cell tension, Hindbrain, Rhombomeres, Apical polarity, Mouse, Chick

## INTRODUCTION

The segregation of different cell populations into distinct territories is a central feature of embryonic development. Pioneering experiments showed that dissociated embryonic cells are able to reaggregate according to their tissue of origin (Townes and Holtfreter, 1955; Steinberg, 1963; Steinberg, 1970). This effect can be mimicked *in vitro* by qualitative and quantitative differences in cell-adhesion molecules such as cadherins, which can regulate tissue surface tension (Foty and Steinberg, 2005; Steinberg, 2007; Ninomiya et al., 2012). During the segmentation of embryonic

epithelia, interfaces between different cell populations form a stable straight barrier to cell intermingling. Classic clonal analysis of the anteroposterior (AP) compartment boundary in the developing *Drosophila* wing epithelium first showed that segmental interfaces are lineage restrictions (Garcia-Bellido et al., 1973; Morata and Lawrence, 1975). Related lineage restrictions are also found in the neuroepithelium of the developing vertebrate hindbrain. These boundaries appear during hindbrain development between seven segmental units called rhombomeres (r1 to r7), which prefigure the metameric organization of adult cranial nerves (Vaage, 1969; Lumsden and Keynes, 1989; Fraser et al., 1990; Birgbauer and Fraser, 1994; Jimenez-Guri et al., 2010). Studies of insect and vertebrate epithelia have provided evidence that three interlinked mechanisms contribute to robust cell segregation: differential adhesion, actomyosin-dependent cortical tension and cell repulsion (reviewed by Dahmann et al., 2011; Batlle and Wilkinson, 2012).

Grafting experiments in the chick indicate that hindbrain boundaries are generated when odd-numbered rhombomeres are placed next to even-numbered ones and there is less cell intermingling between odd-even than between odd-odd or even-even (Guthrie and Lumsden, 1991; Guthrie et al., 1993). One important family of cell-surface molecules that are differentially expressed between odd and even rhombomeres are the Eph receptor tyrosine kinases and their ligands, the ephrins (Nieto et al., 1992; Becker et al., 1994; Bergemann et al., 1995; Flenniken et al., 1996; Gale et al., 1996). At rhombomere interfaces, bi-directional Eph/ephrin signalling restricts cell intermingling by triggering mutual cell-cell repulsion and, within a rhombomere, Eph signalling can regulate cell affinity (Xu et al., 1995; Mellitzer et al., 1999; Xu et al., 1999; Cooke et al., 2001; Cooke et al., 2005). Two key transcription factors that regulate the odd and even properties of rhombomeres are *Krox20* (*Egr2* – Mouse Genome Informatics) and *kreisler/Mafk*. *Krox20* encodes a zinc-finger transcription factor that is specifically expressed in r3 and r5, and regulates the intermingling properties of cells from odd-numbered rhombomeres (Wilkinson et al., 1989; Voiculescu et al., 2001). The downstream targets of *Krox20* are thought to include the molecules responsible for mediating odd versus even rhombomere cell-surface properties. For example, *Epha4* is highly expressed in r3 and r5, and has been shown to be a direct transcriptional target of *Krox20* (Theil et al., 1998). *Kreisler* encodes a transcription factor (*Mafk*) that is expressed in r5 and r6 (Cordes and Barsh, 1994). In zebrafish genetic mosaics, cells lacking *Mafk* activity are repulsed from wild-type r5 and r6 territory in an Eph-dependent manner (Moens et al., 1996; Cooke et al., 2001). Within r5, at least some of the cell segregation associated with *kreisler* activity is likely to involve *Krox20* (Frohman et al., 1993; McKay et al., 1994; Moens et al., 1996; Giudicelli et al., 2003; Sadl et al., 2003).

Three lines of evidence indicate that *Krox20*-dependent segregation of odd versus even rhombomere cells cannot account for

<sup>1</sup>Division of Physiology and Metabolism, Medical Research Council, National Institute for Medical Research, The Ridgeway, Mill Hill, London, NW7 1AA, UK.

<sup>2</sup>Division of Developmental Neurobiology, Medical Research Council, National Institute for Medical Research, The Ridgeway, Mill Hill, London, NW7 1AA, UK.

\*Present address: School of Medicine and Medical Science, University College Dublin, Dublin, Ireland.

‡Author for correspondence (agould@nimr.mrc.ac.uk)

This is an Open Access article distributed under the terms of the Creative Commons Attribution License (<http://creativecommons.org/licenses/by/3.0/>), which permits unrestricted use, distribution and reproduction in any medium provided that the original work is properly attributed.

Received 14 May 2013; Accepted 22 January 2014

all aspects of hindbrain segmentation. First, in both the grafting and the *in vitro* cell segregation experiments, cell miscibility is less efficient between cells from two different odd or even rhombomeres than between cells from the same rhombomere (Guthrie et al., 1993; Wizenmann and Lumsden, 1997). Second, *Krox20* mutants lack r3 and r5 territories but still form morphological grooves that express boundary markers at the positions of r1/r2, r2/r4, r4/r6 and r6/r7 (Schneider-Maunoury et al., 1997). And third, although there is an expression border of *Krox20* associated with all rhombomere interfaces from r2/r3 to r5/r6, this is not the case for the most rostral (r1/r2) and caudal (r6/r7) borders. In this regard, it is interesting that r7 has neither even nor odd character, as it can form a boundary with either r5 or r6 (Guthrie and Lumsden, 1991). Thus, aside from *Krox20*, there must be other AP-patterning genes that are important for regulating rhombomere-specific cell affinities.

Hox genes encode a conserved family of homeodomain transcription factors that are segmentally expressed and have well described functions in specifying AP positional identity in many different contexts (McGinnis and Krumlauf, 1992; Lumsden and Krumlauf, 1996; Alexander et al., 2009; Dasen and Jessell, 2009; Tschopp and Duboule, 2011). In the *Drosophila* embryo, as in the vertebrate hindbrain, the anterior expression borders of many Hox genes coincide with the position of lineage-restricted boundaries (Martinez-Arias and Lawrence, 1985; Vincent and O'Farrell, 1992). Loss of Hox activity in *Drosophila* embryos can result in multiple adjacent segments/parasegments of identical AP character but, importantly, the boundaries between them remain intact (Lewis, 1978; Struhl, 1981). This indicates that *Drosophila* Hox genes are essential for segmental AP character but not for the subdivision of the embryo into lineage-restricted units. By contrast, loss of activity of vertebrate Hox genes not only alters AP identity but, in several single and multiple combinations, can also disrupt rhombomere boundaries (Carpenter et al., 1993; Gavalas et al., 1997; Helmbacher et al., 1998; Studer et al., 1998; Davenne et al., 1999; Rossel and Capecchi, 1999; Barrow et al., 2000). Importantly, in some *Hox1* and *Hox2* mutant genotypes, the expression patterns of *Krox20* and *kreisler* are also strongly disrupted. Thus, the complex bidirectional regulatory interdependence between *Krox20*, *kreisler* and the anterior Hox genes makes it difficult to disentangle their respective outputs relevant to the segmentation process (reviewed by Tümpel et al., 2009). In particular, it is unclear whether Hox genes have any direct input, independent of *Krox20*, into early rhombomere interface formation.

In the present study, we use mouse genetics, retinoic acid (RA) treatments and chick electroporation to investigate the mechanism of segmentation at r6/r7, a caudal hindbrain boundary that does not require *Krox20*. We show that Hox genes of paralogue group 4 are necessary for the r6/r7 boundary and that they also mediate boundary suppression by exogenous RA. Single cell resolution studies of endogenous and artificial Hox4<sup>+</sup>/Hox4<sup>-</sup> interfaces using molecular and morphological markers, as well as measurements of cell-surface areas, demonstrate a non-cell autonomous mechanism for Hox4-induced neuroepithelial cell segregation, apical remodelling and boundary formation. Members of the Hox1, Hox2 and Hox3 groups all share with Hox4 the intrinsic ability to initiate cell segregation when ectopically expressed in the chick neuroepithelium. Co-electroporation experiments are then used to show that, during neuroepithelial cell segregation, *Krox20* can override an r5-resident Hox protein (*Hoxa3*) at the level of a common downstream target. The wider implications of this study for segmental partitioning at rhombomere interfaces are discussed.

## RESULTS

### Hox4 genes are required for the r6/r7 boundary

The murine r6/r7 boundary first becomes visible as a ridge on the apical/ventricular side (or a groove on the basal/pial side) of the neuroepithelium at around embryonic day 9.5 (E9.5). This is concomitant with a sharpening of the *Hoxb4* rostral limit of expression, a process involving feedback between *Hoxb4*, *Hoxd4* and *Arb* (supplementary material Fig. S1A,B) (Serpente et al., 2005). In both mouse and chick, the position of the *Hoxb4* anterior expression border corresponds to the r6/r7 morphological boundary. Hoxb4<sup>+</sup> cells are occasionally observed more anteriorly but these rare 'escapers' are largely excluded from r6 by localization to the pial surface or to the r5/r6 boundary (supplementary material Fig. S1B-D). To investigate the function of Hox4 genes, we generated double mutant embryos (Hoxb4<sup>-/-</sup>; Hoxd4<sup>-/-</sup>) lacking the activities of the only two Hox4 paralogues expressed in r7 before E11 (Behringer et al., 1993; Gould et al., 1997; Morrison et al., 1997). Neither the residual expression of *kreisler* in ventral r6 at E9.25 (Cordes and Barsh, 1994; Theil et al., 2002) nor *Krox20* in dorsal r5 at E9.5 (Wilkinson et al., 1989) were altered in double mutant embryos (supplementary material Fig. S1E-H). At E10.5, however, the r6/r7 posterior limit of the lateral *Phox2b* column (Pattyn et al., 1997) is caudally extended (supplementary material Fig. S1I-J). Thus, *Hoxb4* and *Hoxd4* are not required to regulate the anterior segmentation genes *Krox20* or *kreisler/Mafb* but they are essential for suppressing a later aspect of anterior neural character in r7.

We then tested the role of Hox4 genes in the r6/r7 segmentation process. In Hox4 double mutant embryos, the r1/2 to r5/6 boundaries remain visible in E9.5 sections as basal grooves with increased intercellular spacing but the r6/r7 boundary is absent (Fig. 1A,B). *Crabp1* mRNA is a neural crest marker and, at E9.5, it is strongly expressed in r2 and r4-6 (Maden et al., 1992; McKay et al., 1994). We find that, at E10.5, *Crabp1* marks all rhombomere boundaries but is more strongly expressed in those of r3/4 through to r6/r7 (Fig. 1C). In Hox4 double mutant embryos, there is a specific loss of r6/r7 but not the other *Crabp1*-expressing boundaries (Fig. 1D). The results thus far demonstrate that the r6/r7 segmentation mechanism does not involve *Krox20* or *kreisler/Mafb* but it is strictly dependent upon an input from either *Hoxb4* or *Hoxd4*.

### Misexpression of Hox4 proteins suppresses r6/r7 and more anterior boundaries

We next used exogenous retinoic acid (RA) as an indirect way of misexpressing *Hoxb4* and *Hoxd4* across the r6/r7 interface. RA suppresses varying numbers of hindbrain boundaries, depending upon the treatment stage (Wood et al., 1994; Nittenberg et al., 1997; Dupé and Lumsden, 2001). At E9.25, it expands murine Hox4 expression ectopically into the anterior hindbrain (Conlon and Rossant, 1992; Morrison et al., 1997). To map accurately the anterior limit of Hox4 expression induced by RA at E9.25, we used a transgenic reporter for Hox4-6 proteins: *LNE-LacZ* (Gould et al., 1997; Gould et al., 1998). *LNE-LacZ* reveals that RA treatment at E9.25 induces ectopic expression of *Hoxb4* and *Hoxd4* up to r3/4 in controls but, in Hox4 double mutants, the remaining Hox4-6 genes can only be RA induced up to r5/6 (Fig. 1E,F). Hence, the effects of misexpressing *Hoxb4/Hoxd4* either side of the r6/r7, r5/6 and r4/5 boundaries can be deduced by comparing RA-treated controls with Hox4 double mutants. RA-treated controls show widespread upregulation of *Crabp1* (Leonard et al., 1995) and we find that the distinct stripes of expression at the r4/5, r5/6 and r6/r7 boundaries are missing (Fig. 1G). RA-treated Hox4 double mutants show a similar widespread *Crabp1* upregulation but the r4/5 and r5/6 stripes

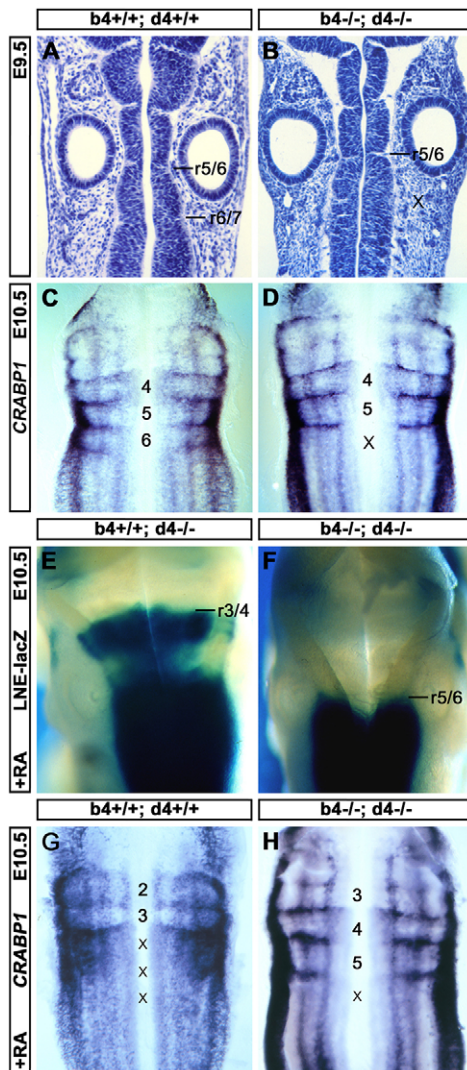

**Fig. 1. Hox4 genes are required for the mouse r6/r7 boundary.**

(A,B) Hematoxylin-stained coronal sections of E9.5 mouse hindbrains showing a visible r6/r7 boundary in wild-type (A) but not in *Hoxb4*<sup>-/-</sup>; *Hoxd4*<sup>-/-</sup> (B) embryos. Positions of posterior rhombomere boundaries (r5/r6, r6/r7) and the presumptive missing r6/r7 boundary (x) are indicated. (C,D) Flat-mounted E10.5 mouse hindbrains showing enrichment of *Crabp1* mRNA at rhombomere boundaries in wild-type (C) and in *Hoxb4*<sup>-/-</sup>; *Hoxd4*<sup>-/-</sup> (D) embryos. The positions of rhombomeres and mispecified r7 (x) are indicated. (E,F) Dorsal views of the hindbrains of E10.5 mouse embryos expressing an LNE-LacZ reporter (blue staining) in a *Hoxb4*<sup>+/+</sup>; *Hoxd4*<sup>-/-</sup> (E) or *Hoxb4*<sup>-/-</sup>; *Hoxd4*<sup>-/-</sup> (F) genetic background after RA treatment at E9.25. The rhombomere boundaries corresponding to the anterior limit of *LacZ* staining (indicating the anterior limit of posterior Hox gene misexpression) are indicated. (G,H) Flat-mounted E10.5 mouse hindbrains showing *Crabp1* mRNA after RA treatment at E9.25 in wild-type (G) and in *Hoxb4*<sup>-/-</sup>; *Hoxd4*<sup>-/-</sup> (H) embryos. Rhombomeres retaining clearly discernible *Crabp1* boundary expression are numbered and those with disrupted boundary expression are indicated with a cross.

of expression are now restored (Fig. 1H). Thus, RA-mediated suppression of the r4/5 and r5/6 boundaries is dependent upon ectopic expression of *Hoxb4* and *Hoxd4*. The RA results also imply that inducing Hox4 expression either side of rhombomere boundaries is sufficient to suppress them.

To test more directly the effects of Hox4 misexpression on segmentation, we used *in ovo* electroporation of chick embryos at

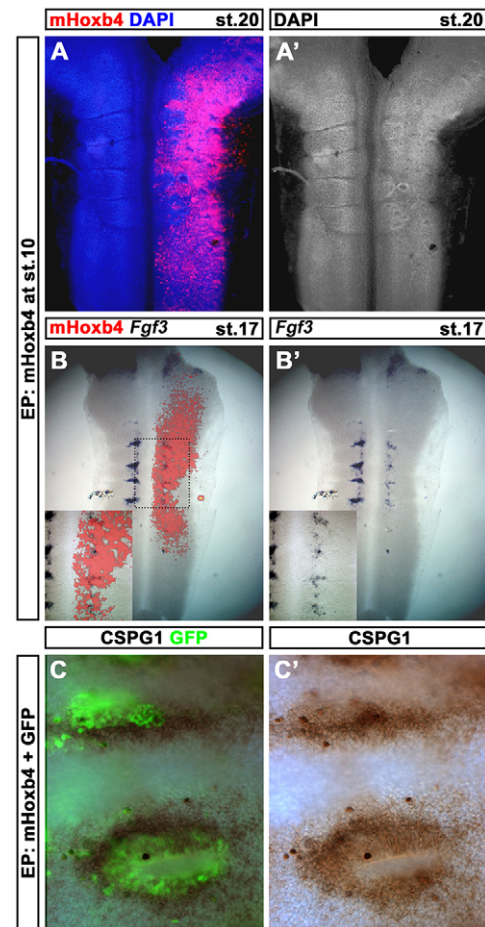

**Fig. 2. Widespread mouse Hoxb4 misexpression suppresses chick rhombomere boundaries.** (A-B') Flat-mounted chick hindbrains electroporated with mouse *Hoxb4*. Ectopic mouse Hoxb4 expression (red) on the electroporated (right) side is indicated in A,B. (A,A') DAPI staining reveals that ectopic Hoxb4 has disrupted morphological segmentation. (B,B') Expression of *Fgf3* mRNA 1 day after electroporation in rhombomere boundaries is reduced or absent on the electroporated side. Residual *Fgf3*<sup>+</sup> cells are displaced by the mouse Hoxb4<sup>+</sup> electroporated cells (insets). (C,C') Flat-mounted chick hindbrains co-electroporated with separate mouse *Hoxb4* and *GFP* plasmids. GFP<sup>+</sup> electroporated cells (green) and the distribution of *Cspg1* are shown. *Cspg1* highlights rhombomere boundaries and is also detected around groups of mouse Hoxb4 electroporated cells.

the 7- to 12-somite stage (HH stages 9-11), when rhombomere boundaries are forming (Vaage, 1969; Lumsden, 1990). By HH stages 19-21 (~48 hours later), hindbrains expressing widespread ectopic murine Hoxb4 (mHoxb4) showed a dramatic disruption of morphological segmentation (Fig. 2A,A'). Consistent with this, repeating stripes of *Fgf3*, a boundary cell marker (Mahmood et al., 1995; Sela-Donenfeld et al., 2009) and chondroitin sulphate proteoglycan 1 (CSPG1), an extracellular matrix protein enriched at boundaries (Heyman et al., 1995) are both suppressed (Fig. 2B,B'; data not shown). Interestingly, we also noticed that when mouse Hoxb4 was distributed in discrete patches within a rhombomere, this often led to localized and pronounced neuroepithelial curvature and CSPG1 was often enriched a few cells on each side of the artificial mouse Hoxb4<sup>+/+</sup> interface (Fig. 2C,C'). The chick and mouse results together demonstrate that an interface between Hox4 expressing and non-expressing cells is necessary and sufficient to trigger morphological and molecular features of a rhombomere boundary.

### Hox4 proteins regulate multiple cell adhesion/repulsion genes

To identify hindbrain targets of Hox4 proteins, we surveyed a panel of genes implicated directly or indirectly in cell adhesion and/or repulsion using the chick electroporation assay. Ectopic expression of mouse Hoxb4 rapidly and strongly repressed the key segmentation gene *Krox20* as well as its direct target *Epha4* (Theil et al., 1998) within r3 and r5 (supplementary material Fig. S2A-H). Ephrin B2 (*Efnb2* – Mouse Genome Informatics), which encodes a known ligand for EphA4, is also moderately downregulated by ectopic mouse Hoxb4 (supplementary material Fig. S2I-L). Negative regulation by mouse Hoxb4 is specific for a subset of Eph/ephrin genes, as *Epha3* expression is not detectably suppressed (data not shown). We also found that ectopic mouse Hoxb4 regulates ephrin A5 (*Efna5* – Mouse Genome Informatics) expression in a context-dependent manner: downregulating it in dorsal r1 but upregulating it in more posterior hindbrain regions (supplementary material Fig. S2M-T). Hence, ectopic Hoxb4 can regulate *Krox20* as well as three genes implicated in cell adhesion/repulsion: *Epha4*, ephrin A5 and ephrin B2. Although only two of these target genes (ephrin A5 and ephrin B2) are substantially co-expressed with endogenous Hoxb4 in r7, they are all candidates for mediating the boundary suppressing effects of ectopic Hoxb4 in the anterior hindbrain.

We next focused on two putative cell-adhesion/repulsion genes that are differentially expressed in r6 versus r7, and so may be relevant transcriptional targets of endogenous Hoxb4. In both chick and mouse hindbrain, the leucine-rich repeat transmembrane protein *LRRTM3* is expressed in dorsal r7 but not in dorsal r6 (Haines and Rigby, 2007) (Fig. 3A). In the chick hindbrain, mouse Hoxb4 misexpression leads to ectopic *Lrrtm3* upregulation in the dorsal anterior hindbrain (Fig. 3A,B). In both chick and mouse, *Epha7* expression in the hindbrain has a posterior limit at the r6/r7 boundary (Araujo and Nieto, 1997). In the mouse, we found that Hoxb4 or Hoxd4 are required to repress inappropriate *Epha7* expression in r7 (Fig. 3C,D). Consistent with this, ectopic mouse Hoxb4 in the chick represses *Epha7* expression in r1-r6 (Fig. 3E,F). Hence *Lrrtm3* and *Epha7* are positive and negative Hox4 targets in r7, respectively, and Hox4 ensures their differential expression either side of the r6/r7 boundary.

### Mosaic expression of Hox4 proteins initiates neuroepithelial cell segregation

In electroporated chick hindbrains with a high degree of mosaicism, we were intrigued by a marked difference in the distribution of mouse Hoxb4<sup>+</sup> compared with GFP<sup>+</sup> control cells. Whereas control GFP<sup>+</sup> cells are interspersed with many non-labelled neighbours in a salt-and-pepper pattern, mouse Hoxb4<sup>+</sup> cells in the midbrain and hindbrain tend to form coherent groups (Fig. 4A-D; data not shown). Despite high electroporation-to-electroporation variability, an automated cell-counting algorithm (Mirenda et al., 2007) (see Materials and methods) revealed that mouse Hoxb4<sup>+</sup> electroporated cells tend to form small groups (four cells or fewer) less frequently and large groups (at least 15 cells) significantly more frequently than control electroporated cells (Fig. 4E). We then generated Hox4 mosaics in a second way, by electroporating a dominant-negative (dn) RAR construct that interferes with the expression of RAR target genes (Blumberg et al., 1997). One direct target is *Hoxb4*, which is strongly downregulated within its endogenous expression domain by dnRAR (Gould et al., 1998). We find that the dnRAR method also produces large coherent groups of electroporated cells, but they are chick Hoxb4<sup>-</sup> rather than mouse Hoxb4<sup>+</sup> (Fig. 4F,G). Moreover, dnRAR electroporated cells can also disrupt the endogenous chick

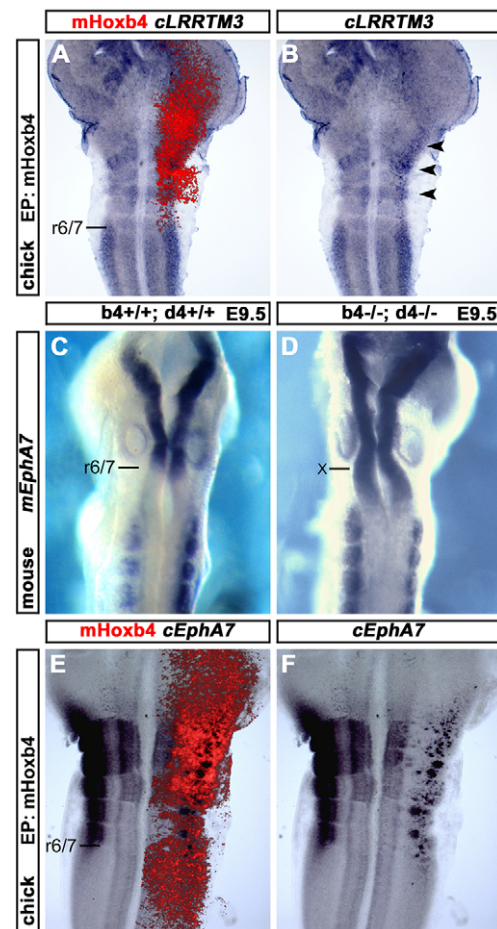

**Fig. 3. Hox4 genes activate *Lrrtm3* and repress *Epha7* expression.** (A,B) Chick *Lrrtm3* mRNA expression in a stage 18 flat-mounted chick hindbrain, following electroporation with mouse Hoxb4 at stage 10. Cells ectopically expressing mouse Hoxb4 (red) and upregulating chick *Lrrtm3* mRNA (arrowheads) are indicated. (C,D) Dorsal views of E9.5 mouse embryos showing mouse *Epha7* mRNA expression in wild-type (C) and Hox4 double mutant (D) embryos. In the absence of Hoxb4 and Hoxd4, mouse *Epha7* expression is derepressed posteriorwards. X indicates position of the presumptive r6/r7 boundary. (E,F) Flat-mounted chick hindbrains, electroporated with mouse Hoxb4 showing that Hoxb4-expressing cells (red) are associated with a downregulation of chick *Epha7* mRNA expression.

r6/r7 boundary (supplementary material Fig. S3A,D). The finding that large cell groups are generated with either mosaic approach indicates that they are unlikely to be an artefact resulting from overly high mouse Hoxb4 expression. Importantly, the observation that either Hox4<sup>+</sup> or Hox4<sup>-</sup> cells can form cell groups suggests that their formation is triggered by a Hox expression interface, rather than by an intrinsic property of Hox4<sup>+</sup> cells per se. The underlying mechanism is therefore likely to correspond to cell segregation. Consistent with this, we find no evidence for alternative mechanisms involving increased cell proliferation and/or cell competition-like processes associated with apoptosis (supplementary material Fig. S4A-J; data not shown).

### Hoxb4 regulates apical cell surface area in a non-autonomous manner

The results thus far provide evidence that a Hox4<sup>+</sup>/Hox4<sup>-</sup> expression interface is necessary and sufficient to promote cell segregation and features of a rhombomere boundary. Previous studies have shown

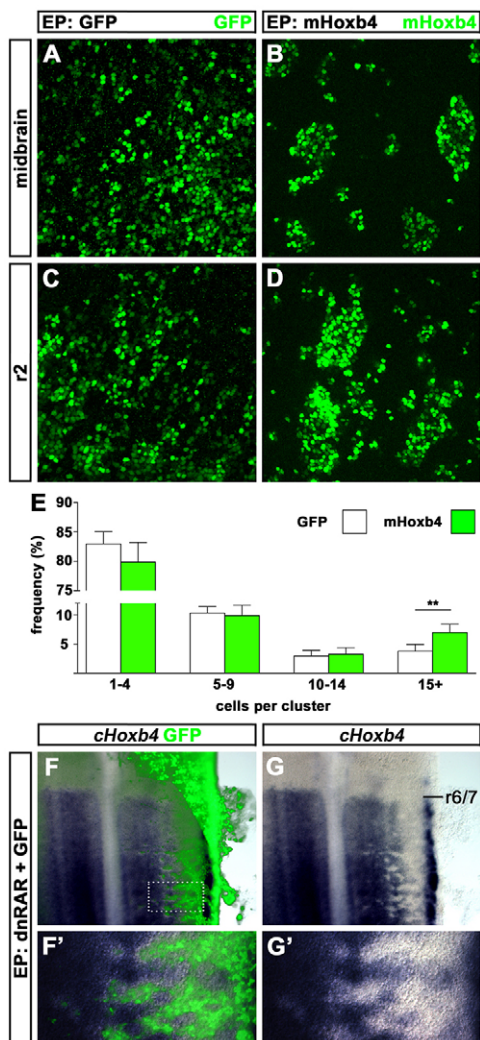

**Fig. 4. Mosaic *Hoxb4* expression induces chick neuroepithelial cell segregation.** (A–D) Confocal z-projections of flat-mount hindbrains electroporated with an *nlsGFP* control plasmid (A, C) or a mouse *Hoxb4-ires-nlsGFP* plasmid (B, D). Electroporated cells are detected by GFP or mouse *Hoxb4* immunostaining (green) as indicated. The region of the CNS shown is indicated on the left (r2 or midbrain). (E) Frequency distribution of cell cluster sizes in *nlsGFP* electroporated (white columns,  $n=19$  independent fields from six embryos) and mouse *Hoxb4* electroporated (green columns,  $n=22$  independent fields from eight embryos) hindbrains. Clusters of 15+ cells are found more frequently in mouse *Hoxb4* electroporated hindbrains. Error bars indicate 95% confidence interval (\*\* $P=0.0062$ , Mann-Whitney test). (F–G') Flat-mount chick hindbrains after co-electroporation of separate *dnRAR* and *GFP* plasmids. Electroporated GFP-expressing cells (green) form cell clusters and are associated with strong downregulation of chick *Hoxb4* mRNA expression in r7 and more posterior CNS regions. (F', G') are higher magnifications of the area indicated by the dotted box.

that there is a cell shape change at boundaries, characterised by an increase in apical surface area (Guthrie et al., 1991; Takahashi and Osumi, 2011). To investigate whether this or other aspects of cell polarity are under *Hox4* control, the distribution of N-cadherin was examined. N-cadherin immunostaining is strong on the apical side of chick neuroepithelial cells but is markedly less dense at rhombomere boundaries (Fig. 5A–C). For electroporated hindbrains in which mouse *Hoxb4*<sup>−</sup> cells locally outnumber mouse *Hoxb4*<sup>+</sup> cells, we observed strong apical N-cadherin staining in the centres of mouse *Hoxb4*<sup>+</sup> cell clusters, correlating with increased apical

constriction and neuroepithelial curvature (Fig. 5D–F). In striking contrast, where mouse *Hoxb4*<sup>+</sup> cells locally outnumber and surround a cluster of mouse *Hoxb4*<sup>−</sup> cells, then strong apical N-cadherin staining, pronounced apical constriction and neuroepithelial curvature tend to be observed in the mouse *Hoxb4*<sup>−</sup> cell population (Fig. 5G–I). Pan-cadherin stainings also revealed that, even in rare cases, when the curvature in the minority mouse *Hoxb4*<sup>+</sup> or mouse *Hoxb4*<sup>−</sup> cell populations is very extreme, the neuroepithelium and the basement membrane remain intact (supplementary material Fig. S5A–E; data not shown). We conclude that when cells segregate within the neuroepithelium in the ectopic *Hoxb4* assay, apical constriction at the centres of these clusters can involve either the *Hoxb4*<sup>+</sup> or the *Hoxb4*<sup>−</sup> cell population.

Rhombomere boundaries are associated with apical enlargement (Guthrie et al., 1991; Takahashi and Osumi, 2011) but we found that a *Hoxb4*<sup>+</sup>/*Hoxb4*<sup>−</sup> interface can drive nearby apical constriction. It is therefore important to define, with high resolution, how cells with small and large apices map onto the endogenous *Hoxb4* expression border. Using the tight junction associated protein ZO-1 as a marker, we observed a zone of cells with large apical surfaces at the mouse and chick r6/r7 boundary, spanning the wiggly mouse *Hoxb4*<sup>+</sup>/*Hoxb4*<sup>−</sup> interface (supplementary material Fig. S6A–E). Cells with large apical areas, more than double the typical inter-rhombomeric value, extend approximately three or four cells on either side of the mouse *Hoxb4*<sup>+</sup>/*Hoxb4*<sup>−</sup> interface in ventrolateral regions (Fig. 6A–C) but this varies as a function of DV position. Importantly, r6/r7 apical enlargement is reduced in *Hoxb4*<sup>+/−</sup>; *Hoxd4*<sup>−/−</sup> (but not in *Hoxb4*<sup>+/+</sup>; *Hoxd4*<sup>−/−</sup>) embryos, and is no longer detectable in complete *Hox4* double mutants (Fig. 6D–J). Hence, *Hox4* genes are required in a dose-dependent manner to drive apical enlargement on both sides of the murine r6/r7 boundary. Similarly, in the chick hindbrain, r6/r7 apical enlargement was abrogated by indirectly blocking *Hox4* expression via electroporation with *dnRAR* (supplementary material Fig. S3). Moreover, ZO-1 analysis of artificial chick *Hoxb4*<sup>+</sup>/*Hoxb4*<sup>−</sup> expression borders, created by *Hoxb4* electroporation in the chick, confirms the earlier cadherin results and shows clearly that segregated *Hoxb4*<sup>+</sup> or *Hoxb4*<sup>−</sup> cell clusters can undergo strong apical constriction at their centres (supplementary material Fig. S6F–K). This chick analysis also reveals strong apical enlargement in cells on both sides of an artificial *Hoxb4* border (Fig. 6K, L; supplementary material Fig. S6F–K). Together, the mouse and chick analyses demonstrate that a *Hox4* border is necessary and sufficient to induce apical enlargement. They also show that *Hox4* proteins can regulate apical remodelling (constriction and enlargement) in both cell and non-cell autonomous manners.

To identify the mechanism by which *Hox4* proteins act, we tested whether any of the *Hoxb4* target genes identified in this study are themselves sufficient to induce chick neuroepithelial cell segregation. Ectopic expression of several targets had little or no discernible effect, indicating that they are not sufficient to induce cell segregation under the conditions of our ectopic electroporation assay (data not shown). However, we observed that ephrin B2 and the closely related protein ephrin B1, were each sufficient to induce cell segregation and to disrupt endogenous rhombomere boundaries (supplementary material Fig. S7A–C'). As with *Hoxb4*, either the electroporated (ephrin B2<sup>+</sup>) or the non-electroporated (ephrin B2<sup>−</sup>) cells can form large cell groups, depending upon their relative frequency. We also observed that ephrin B2<sup>+</sup> and ephrin B2<sup>−</sup> cell clusters displayed apical remodelling features similar to those seen with *Hoxb4* clusters (supplementary material Fig. S7D–I). These findings demonstrate that ectopic expression of a *Hox4*

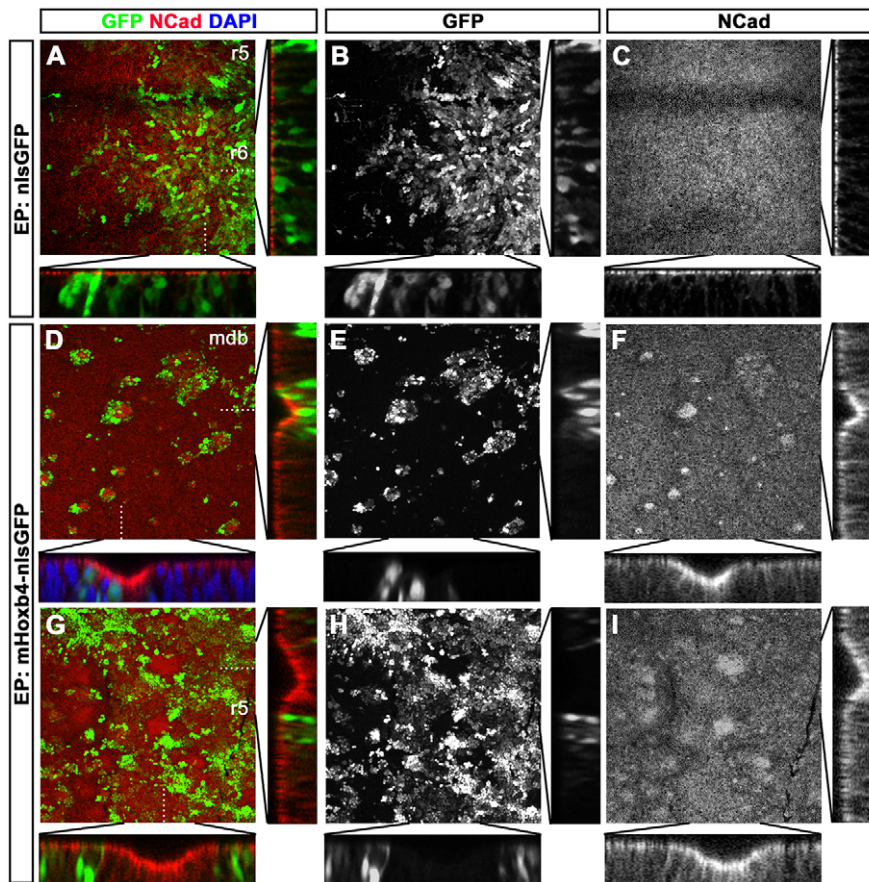

**Fig. 5. Mosaic mouse Hoxb4 induces non-cell-autonomous redistribution of cadherins and apical constriction.** (A-I) Flat-mounted chick hindbrains after electroporation with an *nlsGFP* control plasmid (A-C) or a bicistronic mouse *Hoxb4-ires-nlsGFP* plasmid (D-I). GFP (green) and N-cadherin (red) expression are shown in confocal z-projections of 29  $\mu\text{m}$  encompassing the apical surface and subapical zone. Magnified YZ and XZ orthogonal projections are shown on the right and bottom of each panel. Black lines indicate the magnified region and white dotted lines the projection coordinates. (A-C) Projection from the r6 region showing uniform N-cadherin staining in GFP expressing and non-expressing cells. (D-F) Projection from the posterior midbrain/anterior hindbrain area showing that N-cadherin staining is increased in mouse Hoxb4/GFP-expressing cell clusters. Orthogonal projections reveal that increased N-cadherin staining in mouse Hoxb4<sup>+</sup> cells is associated with shallow invaginations that remain contiguous with the neuroepithelium. (G-I) Projection from an r5 region with a high frequency of mouse *Hoxb4-nlsGFP* electroporated cells. Increased N-cadherin staining is observed in clusters of non-electroporated cells. Orthogonal projections reveal that increased N-cadherin staining in mouse Hoxb4<sup>-</sup> cells is associated with shallow invaginations that remain contiguous with the neuroepithelium.

transcriptional target, ephrin B2, is sufficient to initiate apical remodelling. They also suggest that at least some of the cell segregation and apical remodelling functions of Hox4 proteins are mediated by Eph/ephrins.

#### Many Hox proteins are sufficient to drive neuroepithelial cell segregation

To determine whether cell segregation and apical remodelling are unique to Hox4 or whether they are a general property of all Hox proteins, we examined several different rhombomere boundaries. At the chick r3/4 boundary, we observed a strong increase in ZO-1 apical cell areas in a strip of several cells wide (Fig. 7A,B). To map accurately the apical cell areas onto segmental gene expression, we used *Epha4* and *Hoxa3* to mark the chick and mouse r4/r5 interfaces respectively. In both species, this revealed that the zone of apical enlargement straddles the r4/r5 gene expression interface, extending several cells on either side (Fig. 7C-F). These results strongly suggest that apical enlargement spanning a gene expression border is a common feature of many rhombomere interfaces, including those that are *Krox20* dependent. This raises the issue of whether Hox proteins contribute to apical remodelling and to cell segregation at *Krox20* interfaces. To address this key issue, we surveyed a panel of Hox and other neural transcription factors for their ability to induce neuroepithelial cell segregation in chick electroporation assays. Neither GFP nor *Sox2* expression led to detectable cell segregation but, consistent with previous results (Giudicelli et al., 2001), ectopic *Krox20* generated medium-to-large patches of *Epha4*-expressing cells in even rhombomeres (Fig. 7G). Strikingly, when Hox proteins were surveyed, not only *Hoxd4* but also those expressed in more anterior regions of the hindbrain (mouse *Hoxb1*,

mouse *Hoxa2*, mouse *Hoxa3* and human *HOXB3*) were sufficient to induce large neuroepithelial cell clusters (Fig. 7G). We also examined apical profiles in clusters of *Hoxa2*-, *Hoxa3*- or *Krox20*-expressing cells and, in each case, observed central apical constriction and peripheral apical enlargement similar to that seen with *Hoxb4* (supplementary material Fig. S8). We note, however, that if two neuroepithelial cell populations ectopically expressing a different Hox protein are confronted, then they tend to intermingle within mixed clusters (data not shown). This suggests that either Hox proteins all induce similar neuroepithelial cell affinities or that the high gene expression in this ectopic assay masks any intrinsic differences between Hox proteins. Either way, this survey demonstrates that Hox proteins of all four paralogue groups expressed within the hindbrain and *Krox20* share the potential to drive neuroepithelial cell segregation and apical remodelling.

#### *Krox20* can largely override *Hoxa3* at the level of a downstream target: *Epha4*

The above findings prompt the question of how does the cell segregation function of *Krox20* relate to those of Hox proteins expressed endogenously in r3 and/or r5? We therefore ectopically co-expressed *Krox20* with an r5 resident (*Hoxa3*) or a non-resident (*Hoxb4*) Hox protein. A previous study showed that ectopic expression of *Krox20* alone, not only activates *Epha4* in electroporated cells but also induces *Krox20* and *Epha4* several cell diameters away, via non-cell autonomous auto-activation (Giudicelli et al., 2001). Consistent with this, we observe that *Krox20* electroporated and non-electroporated cells both contribute to large coherent patches of *Epha4*<sup>+</sup> tissue in even rhombomeres (supplementary material Fig. S9A,B). By contrast, ectopic

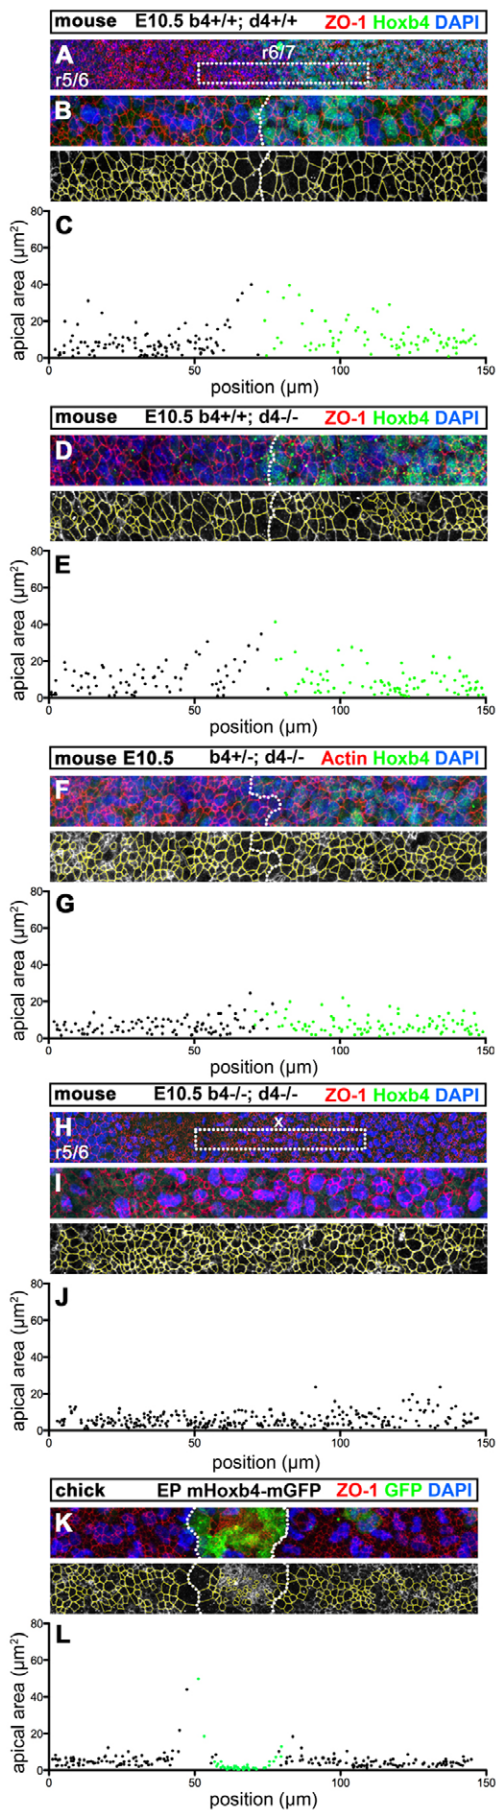

**Fig. 6. Hox4 proteins are necessary and sufficient to induce non-autonomous apical cell enlargement.** (A-H) Confocal immunostaining for Hoxb4 (green) and ZO-1 (red) on E10.5 flat-mounted mouse hindbrains of wild-type (*Hoxb4*<sup>+/+</sup>; *Hoxd4*<sup>+/+</sup>) (A,B), *Hoxb4*<sup>+/+</sup>; *Hoxd4*<sup>-/-</sup> (D), *Hoxb4*<sup>-/-</sup>; *Hoxd4*<sup>-/-</sup> (F) and Hox4 double-mutant (H,I) embryos at a lateral level of the r6/r7 boundary region. The r6/r7 boundary or its presumptive position (x) are indicated in A and H. (B,I) Confocal z-projections of similar magnifications of the r6/r7 boundary region as in D (corresponding to dotted boxes in A and H) showing the apical cell outlines (yellow) used for quantitation. (C,E,G,J) Apical areas (µm<sup>2</sup>) with respect to the anteroposterior position of the cells in B,D,F,I, respectively. Hoxb4<sup>+</sup> (green) and Hoxb4<sup>-</sup> (black) cells are indicated. (K,L) Confocal z-projections and ZO-1 apical outlines (yellow) of the chick r5 neuroepithelium electroporated with mouse *Hoxb4*-mGFP. (K) Mouse Hoxb4<sup>+</sup>GFP<sup>+</sup> cells (green) form a cluster with a well-defined interface (dotted line). (L) Corresponding apical cell areas (µm<sup>2</sup>) with respect to anteroposterior position for mouse Hoxb4<sup>+</sup> (green) and mouse Hoxb4<sup>-</sup> (black) cells. Anterior is towards the left.

expression of *Hoxa3* or *Hoxb4* alone leads to repression of *Epha4* within odd rhombomeres (supplementary material Fig. S9C,D,G,H). Given that *Krox20* and Hox proteins have different activities, we were able to use co-electroporation to conduct epistasis tests at the level of competition for a common downstream target: *Epha4*. In both the *Krox20*/*Hoxa3* or the *Krox20*/*Hoxb4* combinations, we observed that co-electroporated cells strongly expressed *Epha4* in even rhombomeres but that the non-cell autonomous range of *Epha4* induction in non-electroporated cells was greatly restricted (supplementary material Fig. S9E,F,I,J). Hence, ectopic *Krox20* predominates over ectopic Hox protein with respect to cell-autonomous activation rather than repression of *Epha4*. Hox proteins can, however, restrict the non-cell autonomous range of *Epha4* induction by *Krox20*. Together, the results of the ectopic co-expression assays indicate that *Krox20* and Hox proteins can both induce apical remodelling but that they regulate *Epha4* in opposite ways. They also suggest that *Krox20* may promote the cell segregation properties of odd rhombomeres, at least in part by overriding the ability of resident r3/r5 Hox proteins to regulate cell-surface molecules such as *Epha4*.

## DISCUSSION

### Non-cell-autonomous roles for Hox4 proteins during boundary formation

The segregation of cells into two non-intermingling populations is thought to drive subsequent specializations, including increased apical cell area, actomyosin enrichment and the expression of local organizer signals (reviewed by Dahmann et al., 2011; Battle and Wilkinson, 2012). Three lines of evidence were provided that a Hox4<sup>+</sup>/Hox4<sup>-</sup> expression border is both necessary and sufficient to stimulate cell segregation and thus to define the site of a future rhombomere boundary. First, *Hoxb4* and *Hoxd4* are expressed on the posterior side of the r6/r7 interface and are strictly required for apical remodelling and other features of the r6/r7 boundary. Second, either direct or RA-induced misexpression of Hox4 proteins on both sides of r6/r7 or other presumptive rhombomere boundaries is sufficient to suppress their formation. And third, artificial Hox4 borders stimulate cell segregation, apical remodelling and molecular characteristics of boundaries. Consistent with a key role in cell segregation, we found that Hox4 proteins regulate multiple genes encoding cell surface molecules implicated in adhesion/repulsion such as *Lrrtm3* and several Eph/ephrin proteins. Although many of these may be needed to mediate the neuroepithelial functions of *Hoxb4*, at least one of them, ephrin B2, is sufficient to induce cell segregation and apical remodelling in our ectopic expression assay.

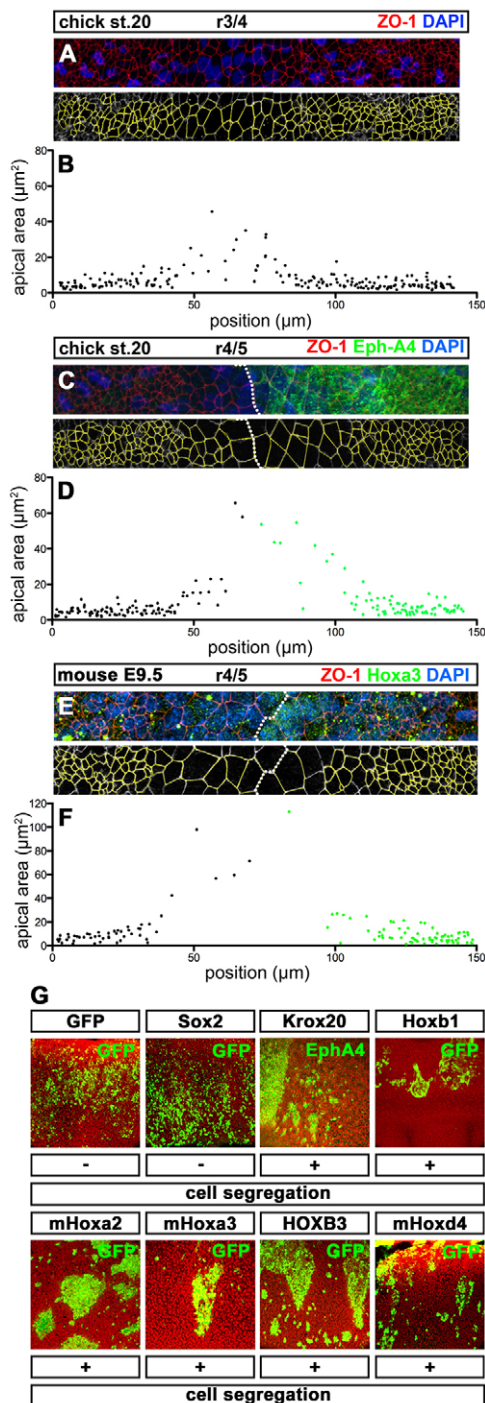

**Fig. 7. Several different Hox proteins can induce neuroepithelial cell segregation.** (A-F) Confocal z-projections of confocal stacks through the apical surface of flat-mounted hindbrains at the mid-D/V level of r3/r4 (A) and r4/r5 (C,E) boundaries. Apical cell areas are detected by ZO-1 immunostaining (red) and the outlines used for analysis are shown in yellow in the respective bottom panels. (B,D,F) Distribution of apical cell areas ( $\mu\text{m}^2$ ) along the anteroposterior axis, as quantified from the above panels. The green data points in D and F indicate the r5 cells expressing EphA4 (C) or Hoxa3 (E), respectively. (G) Confocal z-projections of flat-mounted hindbrains, electroporated with plasmids expressing GFP and various transcription factors. GFP (green) and propidium iodide or DAPI staining (red) are shown in all panels except I, where EphA4 (green) is shown. The presence of absence of robust neuroepithelial cell segregation from observations of multiple electroporated specimens is denoted beneath each panel (+ or -). Anterior is towards the left.

The mechanistic links between apical remodelling and cell segregation are likely to be complex and challenging to disentangle. Nevertheless, when cell segregation is first detected after *Hoxb4* electroporation, apical constriction at the cluster centre is already very pronounced whereas apical enlargement at the cluster periphery is only minimal (data not shown). Hence, strong apical enlargement is not a prerequisite for cell segregation and it may even be a consequence of nearby apical constriction. At both endogenous and artificial *Hoxb4* expression interfaces, *Hoxb4*<sup>+</sup> cells drive apical enlargement, not only in themselves but also in their *Hoxb4*<sup>-</sup> neighbours several cell diameters away. Possible non-cell autonomous mechanisms accounting for this include the spread of a secreted interface-derived signal or mechanical propagation of increased tension over several cell diameters. In many developing epithelia, enlarged apical cell profiles are known to be associated with increased intercellular surface tension (reviewed by Lecuit and Lenne, 2007). Enlarged apical cell profiles have also been observed in the row of cells on either side of the insect AP compartment boundary, where they are associated with increased actomyosin-dependent intercellular surface tension along the boundary (Landsberg et al., 2009). Intercellular surface tension also appears to play a role in chick hindbrain segmentation, where myosin II inhibitor experiments and finite element modelling implicate isotropic contraction within rhombomeres and weak circumferential contraction at rhombomere interfaces (Filas et al., 2012). Future studies will be needed to measure how cell bond tensions vary as a function of distance from the gene expression borders at rhombomere interfaces.

### An ancestral function for Hox proteins in epithelial cell segregation?

This study compared factors driving boundary formation at r6/r7 with those at the four odd-even rhombomere interfaces associated with a *Krox20* expression border (r2/r3 to r5/r6). Although the r6/r7 interface is a bona fide lineage restriction (Fraser et al., 1990; Birgbauer and Fraser, 1994), we showed that it is less straight and displays less pronounced apical remodelling than other interfaces. This correlates, in the chick, with weaker *Fgf3* and *Pax6* expression at r6/r7 than at the *Krox20* boundaries and manipulations of either gene at early somite stages can alter segmentation and boundary gene expression (Marín and Charnay, 2000; Weisinger et al., 2012; Kayam et al., 2013). However, when we ectopically expressed *Pax6* or *Fgf3* (or inhibited *Fgf* signalling) at the later developmental stage used in our *Hox* electroporations, apical remodelling at rhombomere boundaries was not detectably altered (data not shown).

Evidence from numerous gain-of-function electroporations showed that ectopic expression borders of *Krox20* or of hindbrain *Hox* proteins from paralogue groups 1 to 4 are sufficient to initiate cell segregation and apical remodelling. This raises the issue of whether, during normal r3 and r5 development, it is *Krox20* or resident *Hox* proteins such as *Hoxa3* that primarily regulate cell segregation and apical remodelling. To address this, co-electroporation was used to bypass any cross regulation between the *Krox20* and *Hoxa3* loci and to reveal interactions at the level of *Epha4*, a common target for *Krox20* and *Hoxa3* proteins. The finding that *Krox20* activation tends to ‘win out’ over *Hoxa3* repression of *Epha4* suggests that phenotypic suppression of *Hox* proteins (González-Reyes et al., 1990) is an important mechanism of action for *Krox20* during cell segregation. Intriguingly, however, we found that *Hox* proteins were able to restrict the auto-activation of *Epha4*, and thus probably of *Krox20* (Giudicelli et al., 2001), in non-electroporated cells. This suggests that one function of *Hox* expression in even rhombomeres could be to block the spread of



non-cell autonomous auto-activation of *Krox20/Epha4* across the odd/even rhombomere interface. Testing this hypothesis will likely require approaches in which Hox and *Krox20* protein expression can be controlled in more physiological and precise ways than are possible with our current electroporation assay.

Future studies may reveal whether the role for vertebrate Hox proteins in neuroepithelial cell segregation is related to their earlier function in the ordered migration of ingressing epiblast cells during gastrulation (Imura and Pourquié, 2006). Either way, the possibility of a conserved role for the Hox protein family in epithelial cell segregation is strongly suggested when our vertebrate Hox study is taken together with previous *Drosophila* Hox studies (Garcia-Bellido, 1968; Morata and Garcia-Bellido, 1976; Estrada and Sánchez-Herrero, 2001; Gandille et al., 2010; Curt et al., 2013). Thus, in addition to their numerous evolutionarily diverse functions, Hox proteins (and perhaps other homeodomain proteins) may share an ancestral role in cell segregation. In some developmental contexts, this Hox function may suffice to prevent enough cell intermingling but, in others, it could have been largely overridden during evolution by derived segmentation genes such as *Krox20*, engrailed and hedgehog.

## MATERIALS AND METHODS

### Mouse breeding, genotyping and retinoic acid treatment

Animal work was approved by the NIMR local Ethical Review Process and was licensed and conducted under appropriate authority granted by the UK Home Office under the Animals (Scientific Procedures) Act 1986. *Hoxb4* and *Hoxd4* mutant embryos and the Late Neural Enhancer *LacZ* (LNE-*LacZ*) line were generated and genotyped as described (Gould et al., 1997; Gould et al., 1998; Serpente et al., 2005). All-*trans* retinoic acid (25 mg/ml stock in DMSO) was diluted 1:10 in sesame oil and 200  $\mu$ l per pregnant dam (~25 mg/kg bodyweight) administered by gavage at E9.25 as described (Gould et al., 1998).

### In ovo electroporation of chick embryos

Embryos were electroporated at HH stage 9-11 (Hamburger and Hamilton, 1992) as described (Itasaki et al., 1999) but using five 50 ms square pulses of 18 V and analysed 2 days after electroporation, unless otherwise stated. To target the ventral hindbrain, the positive electrode was placed under the embryo and five 50 ms square pulses of 10 V were used. Electroporated constructs were injected at 1-2.5  $\mu$ g/ $\mu$ l for each construct except that pCAGGS-GFP (Momose et al., 1999) was used at 0.6-1  $\mu$ g/ $\mu$ l in co-electroporations. The plasmids used were a bicistronic IRES myristylated GFP (mGFP) version (McLarren et al., 2003) or a bicistronic IRES nuclear GFP (nlsGFP) version (pCIG) (Megason and McMahon, 2002) of pCAGGS with or without insertion of a mouse *Hoxb4* cDNA (a gift from S. Guthrie) or a dominant-negative RAR $\alpha$ 1 construct (Gould et al., 1998). Other electroporated constructs used were: Sox2 (a gift from R. Lovell-Badge, NIMR, London, UK), pAdRSV-*Krox20* (Giudicelli et al., 2001), p $\beta$ Act-pA-mHoxb1 (Pöpperl et al., 1995), pCIG-mHoxa2 (Gouti et al., 2011), pCAGGS-mHoxa3 and pCAGGS-HOXB3 (Guidato et al., 2003), pCAGGS-mHoxd4 [a gift from J. Chilton (Peninsula Medical School, Plymouth, UK) and S. Guthrie (King's College London, UK)], and pCIG-mEphrinB1 and pCIG-mEphrinB2 (gifts from A. Davy, CBD,CNRS UMR5547, Toulouse, France).

### Immunostaining, in situ hybridization, X-gal and BrdU staining

X-gal staining and immunohistochemistry were performed as described previously (Gould et al., 1997) using fluorescent detection or a DAB kit (SK-4100, Vector Laboratories). Immunohistochemistry on cryosections (12  $\mu$ m) was performed as described (Prin et al., 2005). Primary antibodies used were monoclonal rat anti-mouse *Hoxb4* (1:100; 112 from Developmental Studies Hybridoma Bank) (Gould et al., 1997), anti-Cspg1 (1:100; C8035, Sigma-Aldrich), rabbit anti-*Krox20* (1:100; Cambridge Bioscience), rabbit anti-*Epha4* (1:800) (Irving et al., 1996), rabbit anti-GFP

(1:800; A-6455, Molecular Probes), mouse monoclonal anti-pan-cadherin (1:100; C1821, Sigma-Aldrich), mouse monoclonal anti-N-cadherin (1:100; C3865, Sigma-Aldrich), mouse monoclonal anti-ZO-1 (1:100; 339194, Molecular Probes) and rabbit anti-mouse *Hoxa3* (1:1000) (Dasen et al., 2005). Fluorescent secondary antibodies (1:500) were from Molecular Probes and Jackson ImmunoResearch, and HRP-conjugated anti-rat antibody was from DAKO (PO449). DAPI and/or Alexa633 phalloidin (A22284, Molecular Probes) were mixed with secondary antibodies at 0.1  $\mu$ g/ml and 2 units/ml, respectively. After final washes, samples were post-fixed for 30 minutes with 4% PFA/PBS at room temperature and dissected, then hindbrains were flat-mounted ventricular side up in Vectashield (Vector Laboratories) and analysed using a Leica SP5 confocal microscope. For BrdU labelling, 100  $\mu$ l of 2 mg/ml BrdU (Sigma) was applied to the heart field of electroporated embryos 1 hour before harvesting.

Whole-mount *in situ* hybridization was performed as described (Serpente et al., 2005) using the following cDNA templates: mouse *Crabp1* (Stoner and Gudas, 1989), mouse *Phox2b* (Pattyn et al., 1997), mouse kreisler (Theil et al., 2002), mouse *Krox20* (Wilkinson et al., 1989), chick *Fgf3* (EST clone 812g6, MRC Geneservice), chick *Hoxb4* (Itasaki et al., 1996), chick *Epha4* and chick ephrin A5 (Prin et al., 2005), mouse *Epha7* (Manzanares et al., 1999) and chick *Epha7* (Araujo and Nieto, 1997). To prepare a chick *Lrrtm3* probe, a full-length chick *Lrrtm3* cDNA was amplified by RT-PCR from stage HH15 head RNA and cloned by RT-PCR in pBlueScript-KS. After NBT/BCIP staining, samples were washed in NTMT and then PBS, post-fixed in 4% PFA/PBS and, where necessary, further processed for immunostaining. Whole specimens or flat-mounted hindbrains (anterior oriented towards the top or left) were analysed by bright field and epifluorescence on a Zeiss Axioplan microscope.

### Image analysis

For Fig. 7E, confocal optical sections were acquired from fields with less than 50% GFP<sup>+</sup> pixels (estimated using Huang thresholding and ImageJ particle analysis). Average projection of a 7  $\mu$ m z-stack beneath the apical surface of the neuroepithelium was used for analysis. Images were segmented using a local maximum seeded watershed approach (LMSW), identifying single cells by nlsGFP intensity profile and clusters by the distance between cell intensity centroids according to fixed criteria (minimal particle width: 2.5  $\mu$ m, maximum particle width: 10  $\mu$ m, maximal distance for grouping: 8  $\mu$ m) (detailed method in Zhu et al., 2010). Apical cell contours were traced manually from maximal z-projections of the apical zone of the ZO-1 channel (displayed in Figs 6 and 7 with the corresponding but deeper subapical zone of the Hox channel, as this contains the nucleus) and the area and position saved using the ROI manager (ImageJ). For BrdU labelling, pixel counts using the ROI tool were made at identical dorsoventral levels of electroporated and contralateral sides. Graphs and statistical analyses utilized Prism (GraphPad).

### Acknowledgements

We thank P. Charnay, J. Chilton, J. Christiansen, J. Dasen, A. Davy, M. Gasmann, M. Gouti, S. Guthrie, R. Krumlauf, R. Lovell-Badge, A. Nieto and D. Wilkinson for reagents and NIMR Biological Services, W. Hatton and Y. Gu for animal husbandry, histology and technical advice. We acknowledge C. Benassayag, D. Cribbs and E. Sanchez-Herrero for communicating results prior to publication. We also thank C. Benassayag, R. Krumlauf, E. Sanchez-Herrero and D. Wilkinson for advice and critical reading of the manuscript.

### Competing interests

The authors declare no competing financial interests.

### Author contributions

F.P., P.S., N.I. and A.P.G. conceived and designed the experiments. F.P., P.S., N.I. and A.P.G. performed the experiments. F.P. and A.P.G. wrote the manuscript.

### Funding

This work was supported by the UK Medical Research Council (U117584237). Deposited in PMC for immediate release.

### Supplementary material

Supplementary material available online at <http://dev.biologists.org/lookup/suppl/doi:10.1242/dev.098954/-/DC1>

## References

- Alexander, T., Nolte, C. and Krumlauf, R. (2009). Hox genes and segmentation of the hindbrain and axial skeleton. *Annu. Rev. Cell Dev. Biol.* **25**, 431-456.
- Araujo, M. and Nieto, M. A. (1997). The expression of chick EphA7 during segmentation of the central and peripheral nervous system. *Mech. Dev.* **68**, 173-177.
- Barrow, J. R., Stadler, H. S. and Capecchi, M. R. (2000). Roles of Hoxa1 and Hoxa2 in patterning the early hindbrain of the mouse. *Development* **127**, 933-944.
- Battle, E. and Wilkinson, D. G. (2012). Molecular mechanisms of cell segregation and boundary formation in development and tumorigenesis. *Cold Spring Harb. Perspect. Biol.* **4**, a008227.
- Becker, N., Seitaniidou, T., Murphy, P., Mattéi, M. G., Topilko, P., Nieto, M. A., Wilkinson, D. G., Charnay, P. and Gilardi-Hebenstreit, P. (1994). Several receptor tyrosine kinase genes of the Eph family are segmentally expressed in the developing hindbrain. *Mech. Dev.* **47**, 3-17.
- Behringer, R. R., Crotty, D. A., Tennyson, V. M., Brinster, R. L., Palmiter, R. D. and Wolgemuth, D. J. (1993). Sequences 5' of the homeobox of the Hox-1.4 gene direct tissue-specific expression of lacZ during mouse development. *Development* **117**, 823-833.
- Bergemann, A. D., Cheng, H. J., Brambilla, R., Klein, R. and Flanagan, J. G. (1995). ELF-2, a new member of the Eph ligand family, is segmentally expressed in mouse embryos in the region of the hindbrain and newly forming somites. *Mol. Cell. Biol.* **15**, 4921-4929.
- Birgbauer, E. and Fraser, S. E. (1994). Violation of cell lineage restriction compartments in the chick hindbrain. *Development* **120**, 1347-1356.
- Blumberg, B., Bolado, J., Jr, Moreno, T. A., Kintner, C., Evans, R. M. and Papalopulu, N. (1997). An essential role for retinoic signaling in anteroposterior neural patterning. *Development* **124**, 373-379.
- Carpenter, E. M., Goddard, J. M., Chisaka, O., Manley, N. R. and Capecchi, M. R. (1993). Loss of Hox-A1 (Hox-1.6) function results in the reorganization of the murine hindbrain. *Development* **118**, 1063-1075.
- Conlon, R. A. and Rossant, J. (1992). Exogenous retinoic acid rapidly induces anterior ectopic expression of murine Hox-2 genes in vivo. *Development* **116**, 357-368.
- Cooke, J., Moens, C., Roth, L., Durbin, L., Shiomu, K., Brennan, C., Kimmel, C., Wilson, S. and Holder, N. (2001). Eph signalling functions downstream of Val to regulate cell sorting and boundary formation in the caudal hindbrain. *Development* **128**, 571-580.
- Cooke, J. E., Kemp, H. A. and Moens, C. B. (2005). EphA4 is required for cell adhesion and rhombomere-boundary formation in the zebrafish. *Curr. Biol.* **15**, 536-542.
- Cordes, S. P. and Barsh, G. S. (1994). The mouse segmentation gene *kr* encodes a novel basic domain-leucine zipper transcription factor. *Cell* **79**, 1025-1034.
- Curt, J. R., de Navas, L. F. and Sánchez-Herrero, E. (2013). Differential activity of Drosophila Hox genes induces myosin expression and can maintain compartment boundaries. *PLoS ONE* **8**, e57159.
- Dahmann, C., Oates, A. C. and Brand, M. (2011). Boundary formation and maintenance in tissue development. *Nat. Rev. Genet.* **12**, 43-55.
- Dasen, J. S. and Jessell, T. M. (2009). Hox networks and the origins of motor neuron diversity. *Curr. Top. Dev. Biol.* **88**, 169-200.
- Dasen, J. S., Tice, B. C., Brenner-Morton, S. and Jessell, T. M. (2005). A Hox regulatory network establishes motor neuron pool identity and target-muscle connectivity. *Cell* **123**, 477-491.
- Davenne, M., Maconochie, M. K., Neun, R., Pattyn, A., Chambon, P., Krumlauf, R. and Rijli, F. M. (1999). Hoxa2 and Hoxb2 control dorsoventral patterns of neuronal development in the rostral hindbrain. *Neuron* **22**, 677-691.
- Dupé, V. and Lumsden, A. (2001). Hindbrain patterning involves graded responses to retinoic acid signalling. *Development* **128**, 2199-2208.
- Estrada, B. and Sánchez-Herrero, E. (2001). The Hox gene Abdominal-B antagonizes appendage development in the genital disc of Drosophila. *Development* **128**, 331-339.
- Filas, B. A., Oltean, A., Majidi, S., Bayly, P. V., Beebe, D. C. and Taber, L. A. (2012). Regional differences in actomyosin contraction shape the primary vesicles in the embryonic chicken brain. *Phys. Biol.* **9**, 066007.
- Flenniken, A. M., Gale, N. W., Yancopoulos, G. D. and Wilkinson, D. G. (1996). Distinct and overlapping expression patterns of ligands for Eph-related receptor tyrosine kinases during mouse embryogenesis. *Dev. Biol.* **179**, 382-401.
- Foty, R. A. and Steinberg, M. S. (2005). The differential adhesion hypothesis: a direct evaluation. *Dev. Biol.* **278**, 255-263.
- Fraser, S., Keynes, R. and Lumsden, A. (1990). Segmentation in the chick embryonic hindbrain is defined by cell lineage restrictions. *Nature* **344**, 431-435.
- Frohman, M. A., Martin, G. R., Cordes, S. P., Halamek, L. P. and Barsh, G. S. (1993). Altered rhombomere-specific gene expression and hyoid bone differentiation in the mouse segmentation mutant, *kreisler* (*kr*). *Development* **117**, 925-936.
- Gale, N. W., Flenniken, A., Compton, D. C., Jenkins, N., Copeland, N. G., Gilbert, D. J., Davis, S., Wilkinson, D. G. and Yancopoulos, G. D. (1996). Elk-L3, a novel transmembrane ligand for the Eph family of receptor tyrosine kinases, expressed in embryonic floor plate, roof plate and hindbrain segments. *Oncogene* **13**, 1343-1352.
- Gandille, P., Narbonne-Reveau, K., Boissonneau, E., Randsholt, N., Busson, D. and Pret, A. M. (2010). Mutations in the polycomb group gene *polyhomeotic* lead to epithelial instability in both the ovary and wing imaginal disc in Drosophila. *PLoS ONE* **5**, e13946.
- García-Bellido, A. (1968). Cell affinities in antennal homoeotic mutants of Drosophila melanogaster. *Genetics* **59**, 487-499.
- García-Bellido, A., Ripoll, P. and Morata, G. (1973). Developmental compartmentalisation of the wing disk of Drosophila. *Nat. New Biol.* **245**, 251-253.
- Gavalas, A., Davenne, M., Lumsden, A., Chambon, P. and Rijli, F. M. (1997). Role of Hoxa-2 in axon pathfinding and rostral hindbrain patterning. *Development* **124**, 3693-3702.
- Giudicelli, F., Taillebourg, E., Charnay, P. and Gilardi-Hebenstreit, P. (2001). Krox-20 patterns the hindbrain through both cell-autonomous and non cell-autonomous mechanisms. *Genes Dev.* **15**, 567-580.
- Giudicelli, F., Gilardi-Hebenstreit, P., Mechta-Grigoriou, F., Poquet, C. and Charnay, P. (2003). Novel activities of *Mafk* underlie its dual role in hindbrain segmentation and regional specification. *Dev. Biol.* **253**, 150-162.
- González-Reyes, A., Urquía, N., Gehring, W. J., Struhl, G. and Morata, G. (1990). Are cross-regulatory interactions between homoeotic genes functionally significant? *Nature* **344**, 78-80.
- Gould, A., Morrison, A., Sproat, G., White, R. A. and Krumlauf, R. (1997). Positive cross-regulation and enhancer sharing: two mechanisms for specifying overlapping Hox expression patterns. *Genes Dev.* **11**, 900-913.
- Gould, A., Itasaki, N. and Krumlauf, R. (1998). Initiation of rhombomeric Hoxb4 expression requires induction by somites and a retinoid pathway. *Neuron* **21**, 39-51.
- Gouti, M., Briscoe, J. and Gavalas, A. (2011). Anterior Hox genes interact with components of the neural crest specification network to induce neural crest fates. *Stem Cells* **29**, 858-870.
- Guidato, S., Prin, F. and Guthrie, S. (2003). Somatic motoneuron specification in the hindbrain: the influence of somite-derived signals, retinoic acid and Hoxa3. *Development* **130**, 2981-2996.
- Guthrie, S. and Lumsden, A. (1991). Formation and regeneration of rhombomere boundaries in the developing chick hindbrain. *Development* **112**, 221-229.
- Guthrie, S., Butcher, M. and Lumsden, A. (1991). Patterns of cell division and interkinetic nuclear migration in the chick embryonic hindbrain. *J. Neurobiol.* **22**, 742-754.
- Guthrie, S., Prince, V. and Lumsden, A. (1993). Selective dispersal of avian rhombomere cells in orthotopic and heterotopic grafts. *Development* **118**, 527-538.
- Haines, B. P. and Rigby, P. W. (2007). Developmentally regulated expression of the LRRTM gene family during mid-gestation mouse embryogenesis. *Gene Expr. Patterns* **7**, 23-29.
- Hamburger, V. and Hamilton, H. L. (1992). A series of normal stages in the development of the chick embryo. 1951. *Dev. Dyn.* **195**, 231-272.
- Helmbacher, F., Pujades, C., Desmarquet, C., Frain, M., Rijli, F. M., Chambon, P. and Charnay, P. (1998). Hoxa1 and Krox-20 synergize to control the development of rhombomere 3. *Development* **125**, 4739-4748.
- Heyman, I., Faissner, A. and Lumsden, A. (1995). Cell and matrix specialisations of rhombomere boundaries. *Dev. Dyn.* **204**, 301-315.
- Imura, T. and Pourquie, O. (2006). Collinear activation of Hoxb genes during gastrulation is linked to mesoderm cell ingression. *Nature* **442**, 568-571.
- Irving, C., Nieto, M. A., DasGupta, R., Charnay, P. and Wilkinson, D. G. (1996). Progressive spatial restriction of *Seq-1* and *Krox-20* gene expression during hindbrain segmentation. *Dev. Biol.* **173**, 26-38.
- Itasaki, N., Sharpe, J., Morrison, A. and Krumlauf, R. (1996). Reprogramming Hox expression in the vertebrate hindbrain: influence of paraxial mesoderm and rhombomere transposition. *Neuron* **16**, 487-500.
- Itasaki, N., Bel-Vialar, S. and Krumlauf, R. (1999). 'Shocking' developments in chick embryology: electroporation and in ovo gene expression. *Nat. Cell Biol.* **1**, E203-E207.
- Jimenez-Guri, E., Udina, F., Colas, J. F., Sharpe, J., Padrón-Barthe, L., Torres, M. and Pujades, C. (2010). Clonal analysis in mice underlines the importance of rhombomeric boundaries in cell movement restriction during hindbrain segmentation. *PLoS ONE* **5**, e10112.
- Kayam, G., Kohl, A., Magen, Z., Peretz, Y., Weisinger, K., Bar, A., Novikov, O., Brodski, C. and Sela-Donenfeld, D. (2013). A novel role for Pax6 in the segmental organization of the hindbrain. *Development* **140**, 2190-2202.
- Landsberg, K. P., Farhadifar, R., Ranft, J., Umetsu, D., Widmann, T. J., Bittig, T., Said, A., Jülicher, F. and Dahmann, C. (2009). Increased cell bond tension governs cell sorting at the Drosophila anteroposterior compartment boundary. *Curr. Biol.* **19**, 1950-1955.
- Lecuit, T. and Lenne, P. F. (2007). Cell surface mechanics and the control of cell shape, tissue patterns and morphogenesis. *Nat. Rev. Mol. Cell Biol.* **8**, 633-644.
- Leonard, L., Horton, C., Maden, M. and Pizzey, J. A. (1995). Anteriorization of CRABP-I expression by retinoic acid in the developing mouse central nervous system and its relationship to teratogenesis. *Dev. Biol.* **168**, 514-528.
- Lewis, E. B. (1978). A gene complex controlling segmentation in Drosophila. *Nature* **276**, 565-570.
- Lumsden, A. (1990). The cellular basis of segmentation in the developing hindbrain. *Trends Neurosci.* **13**, 329-335.
- Lumsden, A. and Keynes, R. (1989). Segmental patterns of neuronal development in the chick hindbrain. *Nature* **337**, 424-428.
- Lumsden, A. and Krumlauf, R. (1996). Patterning the vertebrate neuraxis. *Science* **274**, 1109-1115.
- Maden, M., Horton, C., Graham, A., Leonard, L., Pizzey, J., Siegenthaler, G., Lumsden, A. and Eriksson, U. (1992). Domains of cellular retinoic acid-binding protein I (CRABP I) expression in the hindbrain and neural crest of the mouse embryo. *Mech. Dev.* **37**, 13-23.
- Mahmood, R., Kiefer, P., Guthrie, S., Dickson, C. and Mason, I. (1995). Multiple roles for FG-3 during cranial neural development in the chicken. *Development* **121**, 1399-1410.
- Manzanares, M., Trainor, P. A., Nonchev, S., Ariza-McNaughton, L., Brodie, J., Gould, A., Marshall, H., Morrison, A., Kwan, C. T., Sham, M. H. et al. (1999). The role of *kreisler* in segmentation during hindbrain development. *Dev. Biol.* **211**, 220-237.

- Marin, F. and Charnay, P.** (2000). Hindbrain patterning: FGFs regulate *Krox20* and *mafB/kr* expression in the otic/preotic region. *Development* **127**, 4925-4935.
- Martinez-Arias, A. and Lawrence, P. A.** (1985). Parasegments and compartments in the *Drosophila* embryo. *Nature* **313**, 639-642.
- McGinnis, W. and Krumlauf, R.** (1992). Homeobox genes and axial patterning. *Cell* **68**, 283-302.
- McKay, I. J., Muchamore, I., Krumlauf, R., Maden, M., Lumsden, A. and Lewis, J.** (1994). The kreisler mouse: a hindbrain segmentation mutant that lacks two rhombomeres. *Development* **120**, 2199-2211.
- McLarren, K. W., Litsiou, A. and Streit, A.** (2003). *DLX5* positions the neural crest and preplacode region at the border of the neural plate. *Dev. Biol.* **259**, 34-47.
- Megason, S. G. and McMahon, A. P.** (2002). A mitogen gradient of dorsal midline Wnts organizes growth in the CNS. *Development* **129**, 2087-2098.
- Mellitzer, G., Xu, Q. and Wilkinson, D. G.** (1999). Eph receptors and ephrins restrict cell intermingling and communication. *Nature* **400**, 77-81.
- Mirenda, V., Jarmin, S. J., David, R., Dyson, J., Scott, D., Gu, Y., Lechler, R. I., Okkenhaug, K. and Marelli-Berg, F. M.** (2007). Physiologic and aberrant regulation of memory T-cell trafficking by the costimulatory molecule CD28. *Blood* **109**, 2968-2977.
- Moens, C. B., Yan, Y. L., Appel, B., Force, A. G. and Kimmel, C. B.** (1996). *valentino*: a zebrafish gene required for normal hindbrain segmentation. *Development* **122**, 3981-3990.
- Momose, T., Tonegawa, A., Takeuchi, J., Ogawa, H., Umesono, K. and Yasuda, K.** (1999). Efficient targeting of gene expression in chick embryos by microelectroporation. *Dev. Growth Differ.* **41**, 335-344.
- Morata, G. and Garcia-Bellido, A.** (1976). Developmental analysis of some mutants of the bithorax system of *Drosophila*. *Roux's Arch. Dev. Biol.* **179**, 125-143.
- Morata, G. and Lawrence, P. A.** (1975). Control of compartment development by the engrailed gene in *Drosophila*. *Nature* **255**, 614-617.
- Morrison, A., Ariza-McNaughton, L., Gould, A., Featherstone, M. and Krumlauf, R.** (1997). *HOXD4* and regulation of the group 4 paralog genes. *Development* **124**, 3135-3146.
- Nieto, M. A., Gilardi-Hebenstreit, P., Charnay, P. and Wilkinson, D. G.** (1992). A receptor protein tyrosine kinase implicated in the segmental patterning of the hindbrain and mesoderm. *Development* **116**, 1137-1150.
- Ninomiya, H., David, R., Damm, E. W., Fagotto, F., Niessen, C. M. and Winklbauer, R.** (2012). Cadherin-dependent differential cell adhesion in *Xenopus* causes cell sorting in vitro but not in the embryo. *J. Cell Sci.* **125**, 1877-1883.
- Nittenberg, R., Patel, K., Joshi, Y., Krumlauf, R., Wilkinson, D. G., Brickell, P. M., Tickle, C. and Clarke, J. D.** (1997). Cell movements, neuronal organisation and gene expression in hindbrains lacking morphological boundaries. *Development* **124**, 2297-2306.
- Pattyn, A., Morin, X., Cremer, H., Goridis, C. and Brunet, J. F.** (1997). Expression and interactions of the two closely related homeobox genes *Phox2a* and *Phox2b* during neurogenesis. *Development* **124**, 4065-4075.
- Pöpperl, H., Bienz, M., Studer, M., Chan, S. K., Aparicio, S., Brenner, S., Mann, R. S. and Krumlauf, R.** (1995). Segmental expression of *Hoxb-1* is controlled by a highly conserved autoregulatory loop dependent upon *exd/pbx*. *Cell* **81**, 1031-1042.
- Prin, F., Ng, K. E., Thaker, U., Drescher, U. and Guthrie, S.** (2005). Ephrin-As play a rhombomere-specific role in trigeminal motor axon projections in the chick embryo. *Dev. Biol.* **279**, 402-419.
- Rossel, M. and Capecchi, M. R.** (1999). Mice mutant for both *Hoxa1* and *Hoxb1* show extensive remodeling of the hindbrain and defects in craniofacial development. *Development* **126**, 5027-5040.
- Sadl, V. S., Sing, A., Mar, L., Jin, F. and Cordes, S. P.** (2003). Analysis of hindbrain patterning defects caused by the *kreisler(enu)* mutation reveals multiple roles of *Kreisler* in hindbrain segmentation. *Dev. Dyn.* **227**, 134-142.
- Schneider-Maunoury, S., Seitanidou, T., Charnay, P. and Lumsden, A.** (1997). Segmental and neuronal architecture of the hindbrain of *Krox-20* mouse mutants. *Development* **124**, 1215-1226.
- Sela-Donenfeld, D., Kayam, G. and Wilkinson, D. G.** (2009). Boundary cells regulate a switch in the expression of *FGF3* in hindbrain rhombomeres. *BMC Dev. Biol.* **9**, 16.
- Serpente, P., Tümpel, S., Ghyssels, N. B., Niederreither, K., Wiedemann, L. M., Dollé, P., Chambon, P., Krumlauf, R. and Gould, A. P.** (2005). Direct crossregulation between retinoic acid receptor beta and *Hox* genes during hindbrain segmentation. *Development* **132**, 503-513.
- Steinberg, M. S.** (1963). Reconstruction of tissues by dissociated cells. Some morphogenetic tissue movements and the sorting out of embryonic cells may have a common explanation. *Science* **141**, 401-408.
- Steinberg, M. S.** (1970). Does differential adhesion govern self-assembly processes in histogenesis? Equilibrium configurations and the emergence of a hierarchy among populations of embryonic cells. *J. Exp. Zool.* **173**, 395-433.
- Steinberg, M. S.** (2007). Differential adhesion in morphogenesis: a modern view. *Curr. Opin. Genet. Dev.* **17**, 281-286.
- Stoner, C. M. and Gudas, L. J.** (1989). Mouse cellular retinoic acid binding protein: cloning, complementary DNA sequence, and messenger RNA expression during the retinoic acid-induced differentiation of F9 wild type and RA-3-10 mutant teratocarcinoma cells. *Cancer Res.* **49**, 1497-1504.
- Struhl, G.** (1981). A gene product required for correct initiation of segmental determination in *Drosophila*. *Nature* **293**, 36-41.
- Studer, M., Gavalas, A., Marshall, H., Ariza-McNaughton, L., Rijli, F. M., Chambon, P. and Krumlauf, R.** (1998). Genetic interactions between *Hoxa1* and *Hoxb1* reveal new roles in regulation of early hindbrain patterning. *Development* **125**, 1025-1036.
- Takahashi, M. and Osumi, N.** (2011). *Pax6* regulates boundary-cell specification in the rat hindbrain. *Mech. Dev.* **128**, 289-302.
- Theil, T., Frain, M., Gilardi-Hebenstreit, P., Flenniken, A., Charnay, P. and Wilkinson, D. G.** (1998). Segmental expression of the *EphA4* (Sek-1) receptor tyrosine kinase in the hindbrain is under direct transcriptional control of *Krox-20*. *Development* **125**, 443-452.
- Theil, T., Ariza-McNaughton, L., Manzaneres, M., Brodie, J., Krumlauf, R. and Wilkinson, D. G.** (2002). Requirement for downregulation of *kreisler* during late patterning of the hindbrain. *Development* **129**, 1477-1485.
- Townes, P. L. and Holtfreter, J.** (1955). Directed movements and selective adhesion of embryonic amphibian cells. *J. Exp. Zool.* **128**, 53-120.
- Tschopp, P. and Duboule, D.** (2011). A genetic approach to the transcriptional regulation of *Hox* gene clusters. *Annu. Rev. Genet.* **45**, 145-166.
- Tümpel, S., Wiedemann, L. M. and Krumlauf, R.** (2009). *Hox* genes and segmentation of the vertebrate hindbrain. *Curr. Top. Dev. Biol.* **88**, 103-137.
- Vaage, S.** (1969). The segmentation of the primitive neural tube in chick embryos (*Gallus domesticus*). A morphological, histochemical and autoradiographical investigation. *Ergeb. Anat. Entwicklungsgesch.* **41**, 3-87.
- Vincent, J. P. and O'Farrell, P. H.** (1992). The state of engrailed expression is not clonally transmitted during early *Drosophila* development. *Cell* **68**, 923-931.
- Voiculescu, O., Taillebourg, E., Pujades, C., Kress, C., Buart, S., Charnay, P. and Schneider-Maunoury, S.** (2001). Hindbrain patterning: *Krox20* couples segmentation and specification of regional identity. *Development* **128**, 4967-4978.
- Weisinger, K., Kohl, A., Kayam, G., Monsonego-Ornan, E. and Sela-Donenfeld, D.** (2012). Expression of hindbrain boundary markers is regulated by *FGF3*. *Biol. Open* **1**, 67-74.
- Wilkinson, D. G., Bhatt, S., Chavrier, P., Bravo, R. and Charnay, P.** (1989). Segment-specific expression of a zinc-finger gene in the developing nervous system of the mouse. *Nature* **337**, 461-464.
- Wizenmann, A. and Lumsden, A.** (1997). Segregation of rhombomeres by differential chemoaffinity. *Mol. Cell. Neurosci.* **9**, 448-459.
- Wood, H., Pall, G. and Morriss-Kay, G.** (1994). Exposure to retinoic acid before or after the onset of somitogenesis reveals separate effects on rhombomeric segmentation and 3' *HoxB* gene expression domains. *Development* **120**, 2279-2285.
- Xu, Q., Alldus, G., Holder, N. and Wilkinson, D. G.** (1995). Expression of truncated *Sek-1* receptor tyrosine kinase disrupts the segmental restriction of gene expression in the *Xenopus* and zebrafish hindbrain. *Development* **121**, 4005-4016.
- Xu, Q., Mellitzer, G., Robinson, V. and Wilkinson, D. G.** (1999). In vivo cell sorting in complementary segmental domains mediated by Eph receptors and ephrins. *Nature* **399**, 267-271.
- Zhu, D., Jarmin, S., Ribeiro, A., Prin, F., Xie, S. Q., Sullivan, K., Briscoe, J., Gould, A. P., Marelli-Berg, F. M. and Gu, Y.** (2010). Applying an adaptive watershed to the tissue cell quantification during T-cell migration and embryonic development. *Methods Mol. Biol.* **616**, 207-228.
